# Supplementary material for: Music intervention to relieve anxiety and pain in adults undergoing cardiac surgery: a systematic review and meta-analysis
Source: PubMed Central journal article supplement — Open Heart. 2021 Jan 25;8(1):e001474. doi: 10.1136/openhrt-2020-001474 (PMC7839877; doi:10.1136/openhrt-2020-001474), 2021-01-25

**S1 Prisma checklist**

| Section/topic             | #  | Checklist item                                                                                                                                                                                                                                                                                              | Reported on page # |
|---------------------------|----|-------------------------------------------------------------------------------------------------------------------------------------------------------------------------------------------------------------------------------------------------------------------------------------------------------------|--------------------|
| <b>TITLE</b>              |    |                                                                                                                                                                                                                                                                                                             |                    |
| Title                     | 1  | Identify the report as a systematic review, meta-analysis, or both.                                                                                                                                                                                                                                         | 1                  |
| <b>ABSTRACT</b>           |    |                                                                                                                                                                                                                                                                                                             |                    |
| Structured summary        | 2  | Provide a structured summary including, as applicable: background; objectives; data sources; study eligibility criteria, participants, and interventions; study appraisal and synthesis methods; results; limitations; conclusions and implications of key findings; systematic review registration number. | 1                  |
| <b>INTRODUCTION</b>       |    |                                                                                                                                                                                                                                                                                                             |                    |
| Rationale                 | 3  | Describe the rationale for the review in the context of what is already known.                                                                                                                                                                                                                              | 1                  |
| Objectives                | 4  | Provide an explicit statement of questions being addressed with reference to participants, interventions, comparisons, outcomes, and study design (PICOS).                                                                                                                                                  | 2                  |
| <b>METHODS</b>            |    |                                                                                                                                                                                                                                                                                                             |                    |
| Protocol and registration | 5  | Indicate if a review protocol exists, if and where it can be accessed (e.g., Web address), and, if available, provide registration information including registration number.                                                                                                                               | 2                  |
| Eligibility criteria      | 6  | Specify study characteristics (e.g., PICOS, length of follow-up) and report characteristics (e.g., years considered, language, publication status) used as criteria for eligibility, giving rationale.                                                                                                      | 2                  |
| Information sources       | 7  | Describe all information sources (e.g., databases with dates of coverage, contact with study authors to identify additional studies) in the search and date last searched.                                                                                                                                  | 2                  |
| Search                    | 8  | Present full electronic search strategy for at least one database, including any limits used, such that it could be repeated.                                                                                                                                                                               | S2                 |
| Study selection           | 9  | State the process for selecting studies (i.e., screening, eligibility, included in systematic review, and, if applicable, included in the meta-analysis).                                                                                                                                                   | 2                  |
| Data collection process   | 10 | Describe method of data extraction from reports (e.g., piloted forms, independently, in duplicate) and any processes for obtaining and confirming data from investigators.                                                                                                                                  | 2                  |
| Data items                | 11 | List and define all variables for which data were sought (e.g., PICOS, funding sources) and any assumptions and simplifications made.                                                                                                                                                                       | 2                  |

|                                    |    |                                                                                                                                                                                                                        |   |
|------------------------------------|----|------------------------------------------------------------------------------------------------------------------------------------------------------------------------------------------------------------------------|---|
| Risk of bias in individual studies | 12 | Describe methods used for assessing risk of bias of individual studies (including specification of whether this was done at the study or outcome level), and how this information is to be used in any data synthesis. | 2 |
| Summary measures                   | 13 | State the principal summary measures (e.g., risk ratio, difference in means).                                                                                                                                          | 2 |
| Synthesis of results               | 14 | Describe the methods of handling data and combining results of studies, if done, including measures of consistency (e.g., $I^2$ ) for each meta-analysis.                                                              | 3 |

| Section/topic                 | #  | Checklist item                                                                                                                                                                                           | Reported on page # |
|-------------------------------|----|----------------------------------------------------------------------------------------------------------------------------------------------------------------------------------------------------------|--------------------|
| Risk of bias across studies   | 15 | Specify any assessment of risk of bias that may affect the cumulative evidence (e.g., publication bias, selective reporting within studies).                                                             | 3                  |
| Additional analyses           | 16 | Describe methods of additional analyses (e.g., sensitivity or subgroup analyses, meta-regression), if done, indicating which were pre-specified.                                                         | 3                  |
| <b>RESULTS</b>                |    |                                                                                                                                                                                                          |                    |
| Study selection               | 17 | Give numbers of studies screened, assessed for eligibility, and included in the review, with reasons for exclusions at each stage, ideally with a flow diagram.                                          | 3                  |
| Study characteristics         | 18 | For each study, present characteristics for which data were extracted (e.g., study size, PICOS, follow-up period) and provide the citations.                                                             | 3                  |
| Risk of bias within studies   | 19 | Present data on risk of bias of each study and, if available, any outcome level assessment (see item 12).                                                                                                | 3                  |
| Results of individual studies | 20 | For all outcomes considered (benefits or harms), present, for each study: (a) simple summary data for each intervention group (b) effect estimates and confidence intervals, ideally with a forest plot. | 4-6                |
| Synthesis of results          | 21 | Present results of each meta-analysis done, including confidence intervals and measures of consistency.                                                                                                  | 4-6                |
| Risk of bias across studies   | 22 | Present results of any assessment of risk of bias across studies (see Item 15).                                                                                                                          | 3                  |
| Additional analysis           | 23 | Give results of additional analyses, if done (e.g., sensitivity or subgroup analyses, meta-regression [see Item 16]).                                                                                    | 5 + 6              |
| <b>DISCUSSION</b>             |    |                                                                                                                                                                                                          |                    |
| Summary of evidence           | 24 | Summarize the main findings including the strength of evidence for each main outcome; consider their relevance to key groups (e.g., healthcare providers, users, and policy makers).                     | 6 + 7              |
| Limitations                   | 25 | Discuss limitations at study and outcome level (e.g., risk of bias), and at review-level (e.g., incomplete retrieval of identified research, reporting bias).                                            | 7                  |
| Conclusions                   | 26 | Provide a general interpretation of the results in the context of other evidence, and implications for future research.                                                                                  | 7                  |

| <b>FUNDING</b> |    |                                                                                                                                            |   |
|----------------|----|--------------------------------------------------------------------------------------------------------------------------------------------|---|
| Funding        | 27 | Describe sources of funding for the systematic review and other support (e.g., supply of data); role of funders for the systematic review. | 8 |

## S2 Search Strategy

| Database         | Records identified | After de-duplication |
|------------------|--------------------|----------------------|
| embase.com       | 671                | 662                  |
| Medline Ovid     | 378                | 135                  |
| Web of science   | 250                | 93                   |
| Cochrane CENTRAL | 138                | 66                   |
| Google scholar   | 100                | 62                   |
| Total            | 1537               | 1018                 |

### embase.com

(music/de OR 'acoustic stress'/de OR 'music therapy'/de OR singing/de OR musician/de OR 'auditory stimulation'/de OR 'MP3 player'/de OR 'tape recorder'/de OR 'compact disk'/de OR (music\* OR (melod\* NOT (melody NEXT/2 valve\*)) OR song\* OR singing\* OR ((audi\* OR acoustic\* OR sound\*) NEAR/6 (stimul\* OR stress)) OR mp3 OR earphone\* OR headphone\* OR ((ear OR head) NEXT/1 phone\*) OR 'compact disk' OR ((cd OR cassette) NEXT/1 player\*) OR speaker\*):ab,ti) AND ('thorax surgery'/exp OR 'thoracic surgeon'/de OR 'heart disease'/exp/dm\_su OR 'lung disease'/exp/dm\_su OR 'cardiovascular surgery'/de OR 'cardiopulmonary bypass'/de OR (((thorax OR thoracic OR heart OR cardiac OR cardiothora\* OR coronar\* OR valve\* OR cardiovasc\* OR lung OR pulmonar\* OR cardiopulmonar\*) NEAR/6 (surg\* OR operati\* OR replacement\* OR bypass OR postsurg\* OR

postoperati\* OR presurg\* OR preoperati\* OR intrasurg\* OR intraoperati\* OR transplant\* OR implant\* OR prosth\* OR bioprosth\*)  
 OR cabg OR pleurectom\* OR sternotom\* OR thoracotom\* OR sternotom\*):ab,ti) NOT ([animals]/lim NOT [humans]/lim)

### Medline Ovid

(Music / OR Music Therapy / OR Singing / OR Acoustic Stimulation / OR MP3-Player / OR Compact Disks / OR (music\* OR (melod\* NOT (melody ADJ2 valve\*)) OR song\* OR singing\* OR ((audi\* OR acoustic\* OR sound\*) ADJ6 (stimul\* OR stress)) OR mp3 OR earphone\* OR headphone\* OR ((ear OR head) ADJ phone\*) OR compact disk OR ((cd OR cassette) ADJ player\*) OR speaker\*).ab,ti.) AND (exp Heart Diseases /su OR exp Lung Diseases /su OR exp Cardiovascular Surgical Procedures / OR Cardiopulmonary Bypass / OR (((thorax OR thoracic OR heart OR cardiac OR cardiothor\* OR coronar\* OR valve\* OR cardiovasc\* OR lung OR pulmonar\* OR cardiopulmonar\*) ADJ6 (surg\* OR operati\* OR replacement\* OR bypass OR postsurg\* OR postoperati\* OR presurg\* OR preoperati\* OR intrasurg\* OR intraoperati\* OR transplant\* OR implant\* OR prosth\* OR bioprosth\*)) OR cabg OR pleurectom\* OR sternotom\* OR thoracotom\* OR sternotom\*).ab,ti.) NOT (exp animals/ NOT humans/)

### Web of science

TS=(((music\* OR (melod\* NOT (melody NEAR/2 valve\*)) OR song\* OR singing\* OR ((audi\* OR acoustic\* OR sound\*) NEAR/5 (stimul\* OR stress)) OR mp3 OR earphone\* OR headphone\* OR ((ear OR head) NEAR/1 phone\*) OR "compact disk" OR ((cd OR cassette) NEAR/1 player\*) OR speaker\*)) AND (((thorax OR thoracic OR heart OR cardiac OR cardiothor\* OR coronar\* OR valve\*

OR cardiovasc\* OR lung OR pulmonar\* OR cardiopulmonar\*) NEAR/5 (surg\* OR operati\* OR replacement\* OR bypass OR postsurg\* OR postoperati\* OR presurg\* OR preoperati\* OR intrasurg\* OR intraoperati\* OR transplant\* OR implant\* OR prosth\* OR bioprosth\*)) OR cabg OR pleurectom\* OR sternotom\* OR thoracotom\* OR sternotom\*))

### **Cochrane CENTRAL**

((music\* OR (melod\* NOT (melody NEXT/2 valve\*)) OR song\* OR singing\* OR ((audi\* OR acoustic\* OR sound\*) NEAR/6 (stimul\* OR stress)) OR mp3 OR earphone\* OR headphone\* OR ((ear OR head) NEXT/1 phone\*) OR 'compact disk' OR ((cd OR cassette) NEXT/1 player\*) OR speaker\*):ab,ti) AND (((thorax OR thoracic OR heart OR cardiac OR cardiothorac\* OR coronar\* OR valve\* OR cardiovasc\* OR lung OR pulmonar\* OR cardiopulmonar\*) NEAR/6 (surg\* OR operati\* OR replacement\* OR bypass OR postsurg\* OR postoperati\* OR presurg\* OR preoperati\* OR intrasurg\* OR intraoperati\* OR transplant\* OR implant\* OR prosth\* OR bioprosth\*)) OR cabg OR pleurectom\* OR sternotom\* OR thoracotom\* OR sternotom\*):ab,ti)

### **Google scholar (top 100 ranked)**

music|musical|musicotherapy thorax|thoracic|heart|cardiac|cardiothoracic|coronary|valve|cardiovascular

surgery|operative|replacement|bypass|postsurgical|postoperative|presurgical|preoperative|intrasurgical|intraoperative|cabg



## S3 Study characteristics

| Study            | Country | Surgery type                 | Total study population | Race (% white) | Marital status (% married) | Educational level                                                             | Mean age (SD) |             | % Male       |         | Outcome assessment                                                             |
|------------------|---------|------------------------------|------------------------|----------------|----------------------------|-------------------------------------------------------------------------------|---------------|-------------|--------------|---------|--------------------------------------------------------------------------------|
|                  |         |                              |                        |                |                            |                                                                               | Intervention  | Control     | Intervention | Control |                                                                                |
| Ahmadabad, 2016  | Iran    | First time CABG              | 48                     | NR             | 93.8                       | Illiterate 8.3, primary school 47.9, high school 33.3, graduate 10.4          | 55.5(9.5)     | 59.3(11.8)  | 76.0         | 60.9    | Pain (NRS), RR, HR, SBP, DBP                                                   |
| Barnason, 1995   | USA     | CABG                         | 67                     | NR             | NR                         | NR                                                                            | 67.0(9.9)     | 67.0(9.9)   | 67.7         | 67.7    | Anxiety (STAI and NRS), HR, SBP, DBP                                           |
| Bauer, 2011      | USA     | First time CABG and/or valve | 100                    | NR             | NR                         | NR                                                                            | 65.6(12.9)    | 60.2(12.4)  | 75.7         | 78.4    | Anxiety and pain (VAS), HR, SBP, DBP, opioid use                               |
| Blankfield, 1995 | USA     | CABG and valve or valve      | 61                     | 93.4           | 77.0                       | Less than high school 19.7, High school 37.7, some college 22.9, college 19.7 | 60.0(10.4)    | 65.0(7.8)   | 72.0         | 72.0    | SICU stay (days), analgesics use                                               |
| Cigerci, 2015    | Turkey  | CABG                         | 68                     | NR             | 91.2                       | Primary school 79.4, secondary school 19.1, university 1.5                    | 62.3(11.3)    | 60.8(10.3)  | 73.5         | 79.4    | Anxiety (STAI) and pain (VAS), HR, RR, SBP, DBP, SpO <sub>2</sub> , opioid use |
| Heidari, 2015    | Iran    | First time CABG              | 60                     | NR             | 88.3                       | Literate 65.0, illiterate 35.0                                                | 56.3(13.5)    | 60.9(8.7)   | 50.0         | 60.0    | Anxiety (VAS), HR, SBP, DBP, MAP                                               |
| Jafari, 2012     | Iran    | First time CABG and/or valve | 60                     | NR             | NR                         | NR                                                                            | 57.0(11.6)    | 58.6(9.6)   | 46.7         | 40.0    | Pain (NRS)                                                                     |
| Janardan, 2016   | India   | Open heart surgery*          | 60                     | NR             | NR                         | NR                                                                            | NR            | NR          | NR           | NR      | Anxiety (STAI), HR, RR, SBP, DBP                                               |
| Kar, 2015        | India   | Open heart surgery**         | 34                     | NR             | NR                         | NR                                                                            | NR            | NR          | NR           | NR      | Opioid use                                                                     |
| Mirbagher, 2014  | Iran    | First time CABG or valve     | 60                     | NR             | 80.0                       | Secondary education 33.3, diploma 38.3, academic 28.3                         | 46.0(11.25)   | 45.5(11.25) | 40.0         | 56.7    | Pain (VAS)                                                                     |
| Nilsson, 2009A   | Sweden  | First time CABG and/or       | 40                     | NR             | NR                         | NR                                                                            | 64.0(10.0)    | 67.0(7.5)   | 85.0         | 75.0    | HR, MAP, SaO <sub>2</sub>                                                      |



|                               |         | valve                        |            |      |                                                            |                                                   |            |            |            |            |                                                           |  |
|-------------------------------|---------|------------------------------|------------|------|------------------------------------------------------------|---------------------------------------------------|------------|------------|------------|------------|-----------------------------------------------------------|--|
| <b>Nilsson, 2009B</b>         | Sweden  | First time CABG and/or valve | 58         | NR   | NR                                                         | NR                                                | 64.0(11.5) | 69.0(7.5)  | NR         | NR         | Anxiety and pain (NRS), HR, RR, MAP, SaO <sub>2</sub>     |  |
| <b>Schou, 2008</b>            | Denmark | CABG and valve or valve      | 41         | NR   | NR                                                         | NR                                                | 64.1(10.9) | 64.3(8.9)  | 31.9       | 31.9       | Anxiety and pain (VAS), LOS (days)                        |  |
| <b>Schwartz, 2009</b>         | USA     | CABG                         | 67         | NR   | NR                                                         | NR                                                | 63.5(10.6) | 64.8(10.6) | 65.7       | 78.1       | Time on MV (minutes), ICU LOS (minutes)                   |  |
| <b>Sendelbach, 2006</b>       | USA     | CABG and/or valve            | 85         | NR   | NR                                                         | NR                                                | 62.3(14.8) | 64.7(11.4) | 62.0       | 80.6       | Anxiety (STAI), pain (NRS), HR, SBP, DBP, opioid use (ME) |  |
| <b>Stein, 2010</b>            | USA     | CABG or CABG and valve       | 36         | 91.7 | Employed 33.3, retired 44.4, disabled 16.7, unemployed 5.6 | High school 30.6, college 47.2, postgraduate 22.2 | 64.3(11.4) | 65.4(11.0) | 58.8       | 94.7       | Anxiety (HADS)                                            |  |
| <b>Twiss, 2006</b>            | USA     | CABG or valve                | 60         | NR   | NR                                                         | NR                                                | 72.6(2.1)  | 75.1(3.4)  | 33.0       | 33.0       | Anxiety (STAI), time on MV (minutes)                      |  |
| <b>Voss, 2004</b>             | USA     | CABG or valve***             | 40         | NR   | NR                                                         | NR                                                | 63.0(13.0) | 63.0(13.0) | 64.0       | 64.0       | Anxiety and pain (VAS), distress (VAS), opioid use (ME)   |  |
| <b>Zeydi, 2011</b>            | Iran    | CABG or valve                | 60         | NR   | 98.3                                                       | NR                                                | 57.0(11.6) | 58.6(9.6)  | 46.7       | 40.0       | HR, RR, SBP, DBP, MAP, SpO <sub>2</sub>                   |  |
| <b>Zimmerman, 1996</b>        | USA     | CABG                         | 64         | 100  | NR                                                         | NR                                                | 67.0(11.8) | 67.0(11.8) | 64.0       | 64.0       | Pain (VRS)                                                |  |
| <b>Summary of all studies</b> |         |                              | 58.5(16.1) |      |                                                            |                                                   | 61.8(5.8)  | 63.1(6.1)  | 59.0(15.7) | 63.3(18.2) |                                                           |  |

NR = not reported, USA = United States of America, CABG = coronary artery bypass graft, (S)ICU = (surgical) intensive care unit, LOS = length of stay, VAS = visual analogue scale, NRS = numeric rating scale, VRS = verbal rating scale, STAI = state- trait anxiety inventory, HADS = hospital anxiety and depression scale, HR = heart rate, RR = respiratory rate, SBP = systolic blood pressure, DBP = diastolic blood pressure, MAP = mean arterial pressure, ME = morphine equivalent, MV = Mechanical Ventilation, SaO<sub>2</sub> = arterial oxygenation, SpO<sub>2</sub> = oxygen saturation, PaO<sub>2</sub> = partial pressure of oxygen.

\*Atrial septal defect (ASD), ventricular septal defect (VSD), aortic valve diseases, mitral valve disease, tricuspid valve disease, CABG and congenital heart disease and post-operative open heart surgery

\*\* Under cardiopulmonary bypass, surgery type not specified

\*\*\* Coronary artery bypass grafting (CABG) procedures (80%), valve repair (14%), replacement of pulmonary homograft (2%), resection of atrial myxoma (2%), and resection of a right coronary artery aneurysm (2%)

### Music intervention characteristics

| Study            | Timing intervention           | Location      | Delivery     | Frequency (per day) x duration (min.)       | Total duration (min.) | Music description                                                                                                                                                                               | Intervention choice | N intervention group | Control                                    | N control group |
|------------------|-------------------------------|---------------|--------------|---------------------------------------------|-----------------------|-------------------------------------------------------------------------------------------------------------------------------------------------------------------------------------------------|---------------------|----------------------|--------------------------------------------|-----------------|
| Ahmadabad, 2016  | POD 2                         | ICU           | Headphones   | 2 x 30                                      | 60                    | Based on cultural conditions of the society, 60-80 beats/min, general absence of strong rhythms or percussion                                                                                   | Patient preference  | 25                   | Standard care                              | 23              |
| Barnason, 1995   | POD 2-3                       | Ward          | Headphones   | 1 x 30                                      | 60                    | Country western instrumental, fresh aire (by Mannheim Steamroller), winter into spring (by George Winston), prelude and comfort zone (both by Steven Halpern); soothing, facilitates relaxation | Option out of lists | 33                   | Scheduled rest                             | 34              |
| Bauer, 2011      | POD 2-4                       | ICU and ward  | CD player    | 2 x 20                                      | 120                   | Summer song, autumn song, bird song, night song in combination with music                                                                                                                       | Option out of lists | 49                   | Scheduled rest                             | 51              |
| Blankfield, 1995 | Intra-op<br>Post-op<br>LOS    | OR, ICU, ward | Headphones   | 2 x 30                                      | 390                   | Dreamflight II by Herb Ernst                                                                                                                                                                    | Researcher          | 32                   | Intra-op blank tape, post-op standard care | 29              |
| Cigerci, 2015    | Pre-op<br>Post-op<br>LOS      | ICU, ward     | Headphones   | 1 x 1.5h Pre,<br>1 x 30 ICU,<br>1 x 30 ward | NR                    | Turkish classical and folk music                                                                                                                                                                | Patient preference  | 34                   | Standard care                              | 34              |
| Heidari, 2015    | POD 1                         | ICU           | Headphones   | 1 x 30                                      | 30                    | Light music, sounds of nature including sea and bird noises                                                                                                                                     | Researcher          | 30                   | Standard care                              | 30              |
| Jafari, 2012     | POD 1                         | ICU           | Headphones   | 1 x 30                                      | 30                    | Relaxation music pieces, 60-80bpm                                                                                                                                                               | Option out of lists | 30                   | Headphones without music                   | 30              |
| Janardan, 2016   | POD NS                        | NR            | Headphones   | 1 x 20                                      | 20                    | Breathing exercises + music                                                                                                                                                                     | Patient preference  | 30                   | Breathing exercises                        | 30              |
| Kar, 2015        | Pre-op<br>Intra-op<br>Post-op | OR            | Earphones    | NR                                          | NR                    | Raga therapy                                                                                                                                                                                    | Researcher          | 17                   | Earphones with blank CD.                   | 17              |
| Mirbagher, 2014  | POD 0/1                       | ICU           | Headphones   | 1 x 30                                      | 30                    | Sedative music without lyrics, with sustained melodic quality, 60-80bpm, absence of strong rhythms or percussions                                                                               | Researcher          | 30                   | Headphones without music                   | 30              |
| Nilsson, 2009A   | POD 1                         | NR            | Music pillow | 1 x 30                                      | 30                    | Soft, relaxing, 60-80bpm                                                                                                                                                                        | Researcher          | 20                   | Scheduled rest                             | 20              |
| Nilsson, 2009B   | POD 1                         | NR            | Music pillow | 1 x 30                                      | 30                    | Soft, relaxing, 60-80bpm, included different melodies in new age style                                                                                                                          | Researcher          | 28                   | Scheduled rest                             | 30              |

|                                                                                                                                                                                                                                  |                     |             |              |                      |     |                                                                                                                                                                                               |                                                    |    |                          |    |
|----------------------------------------------------------------------------------------------------------------------------------------------------------------------------------------------------------------------------------|---------------------|-------------|--------------|----------------------|-----|-----------------------------------------------------------------------------------------------------------------------------------------------------------------------------------------------|----------------------------------------------------|----|--------------------------|----|
| <b>Schou, 2008</b>                                                                                                                                                                                                               | Pre-op<br>POD 5/6   | Ward        | Music pillow | 4 x 35               | 140 | Easy listening, classical, specially composed, new age                                                                                                                                        | Option out of lists                                | 22 | Scheduled rest           | 19 |
| <b>Schwartz, 2009</b>                                                                                                                                                                                                            | POD 0-1             | ICU         | Headphones   | Average 2-3 sessions | 259 | Light music                                                                                                                                                                                   | Researcher and option out of lists                 | 35 | Standard care            | 32 |
| <b>Sendelbach, 2006</b>                                                                                                                                                                                                          | POD 1-3             | NR          | Headphones   | 2 x 20               | 120 | Easy listening, classical, or jazz (no dramatic changes, instrumental music, 60-70bpm) + brief session of relaxation before music                                                             | Option out of lists                                | 49 | Scheduled rest           | 36 |
| <b>Stein, 2010</b>                                                                                                                                                                                                               | Pre-op<br>Intra-op  | Home,<br>OR | NR           | NR                   | NR  | Relaxing music                                                                                                                                                                                | Researcher                                         | 17 | Standard care            | 19 |
| <b>Twiss, 2006</b>                                                                                                                                                                                                               | Intra-op<br>Post-op | OR, ICU     | Headphones   | NR                   | NR  | Relaxing and calming music (songs available)                                                                                                                                                  | Intra-op option out of lists and post-op own music | 28 | Standard care            | 32 |
| <b>Voss, 2004</b>                                                                                                                                                                                                                | POD 1               | ICU         | Headphones   | 1 x 30               | 30  | Sedative music defined as without lyrics, sustained melodic quality, 60-80bpm, general absence of strong rhythms or percussion. Lists: Synthesizer, harp, piano, orchestra, slow jazz, flute. | Option out of lists                                | 19 | Scheduled rest           | 21 |
| <b>Zeydi, 2011</b>                                                                                                                                                                                                               | POD 0-1             | ICU         | Headphones   | 1 x 30               | 30  | Relaxing music, 60-80bpm                                                                                                                                                                      | Option out of lists                                | 30 | Headphones without music | 30 |
| <b>Zimmerman, 1996</b>                                                                                                                                                                                                           | POD 2-3             | Ward        | Headphones   | 1 x 30               | 60  | Country western instrumental, fresh aire (by Mannheim Steamroller), winter into spring (by George Winston), prelude and comfort zone (both by Steven Halpern); facilitates relaxation)        | Option out of lists                                | 32 | Scheduled rest           | 32 |
| NR = not reported, NS = not specified, ICU = intensive care unit, OR = operation room, POD = postoperative day, Pre-op = preoperative, Intra-op = intraoperative, Post-op = postoperative, LOS = length of stay, min. = minutes. |                     |             |              |                      |     |                                                                                                                                                                                               |                                                    |    |                          |    |

#### S4 Effect of music on anxiety

Forest and funnel plots presenting the effect of the first postoperative music session on postoperative anxiety score.

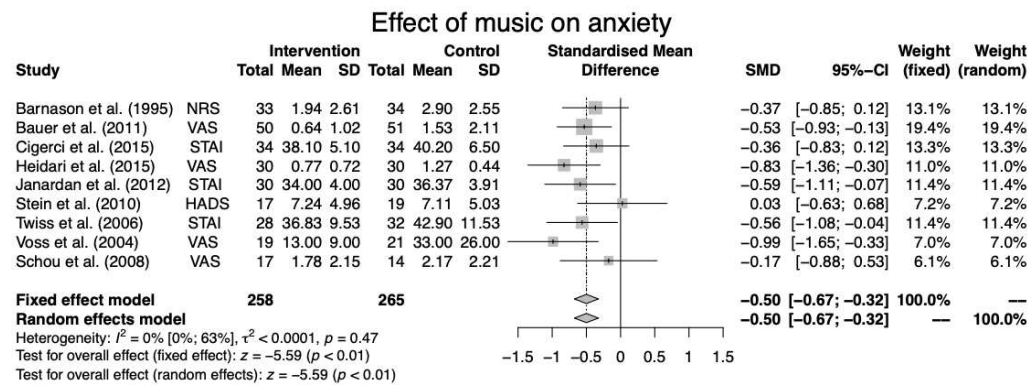

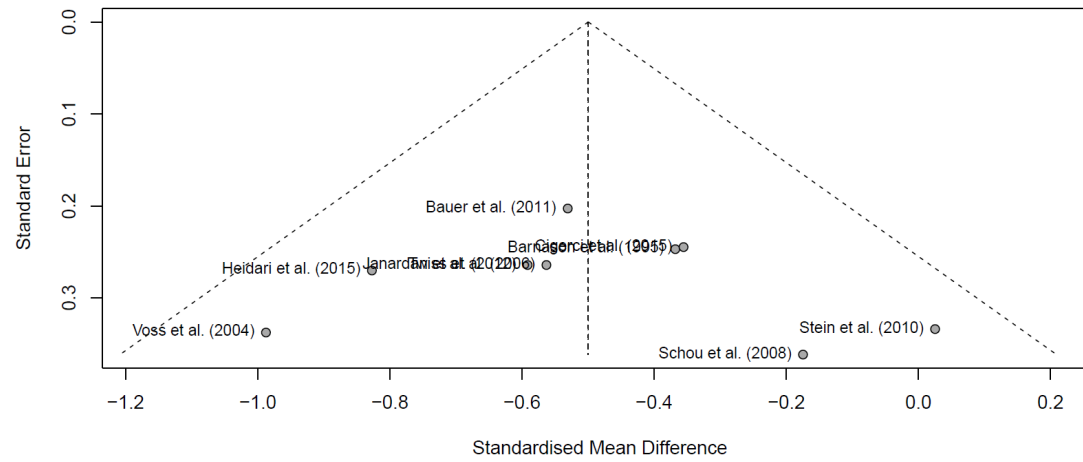

Forest plot of the effect of music intervention on postoperative anxiety scores after the last music session.

### Effect of music on anxiety after multiple days of music intervention

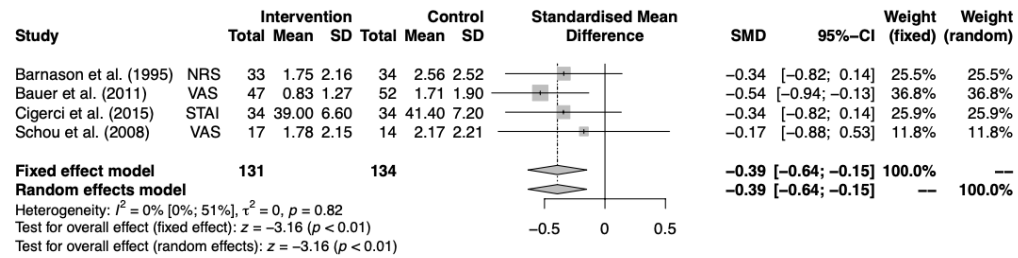

### S5 Effect of music on pain

Forest and funnel plots presenting the effect of the first postoperative music session postoperative music intervention on postoperative pain score.

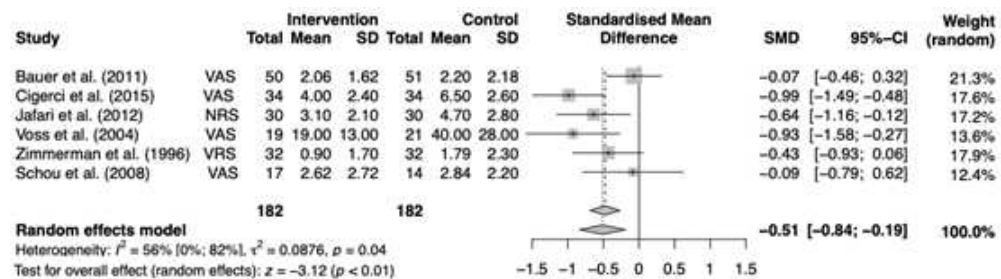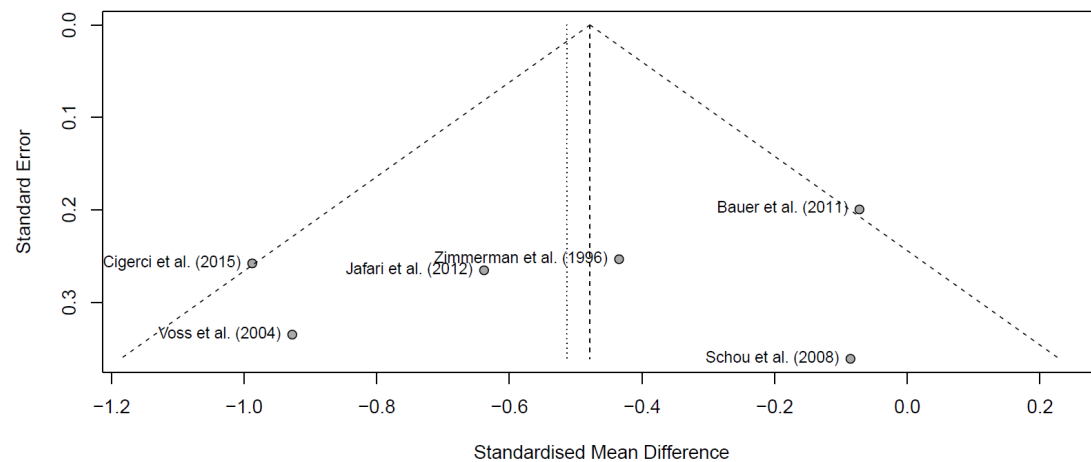

Forest plot of the effect of music intervention on postoperative pain scores after the last music session.

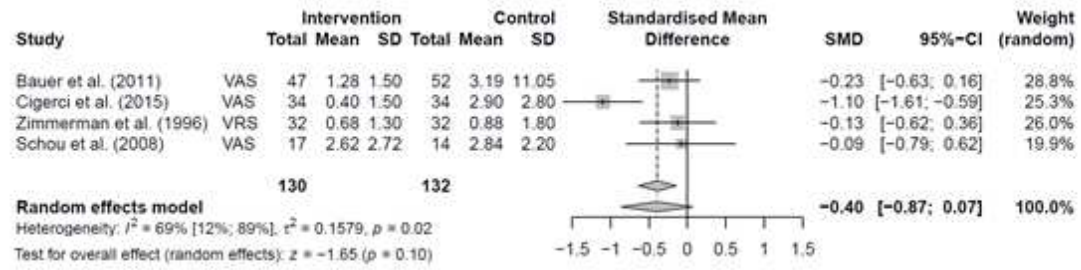



## S6 Subgroup analysis

Forest plot of the effect of preoperative music in combination with postoperative music on postoperative anxiety.

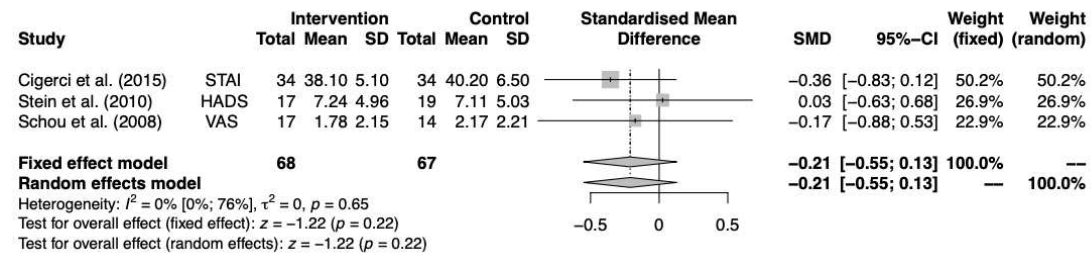

Forest plot of the effect of preoperative music in combination with postoperative music on postoperative pain.

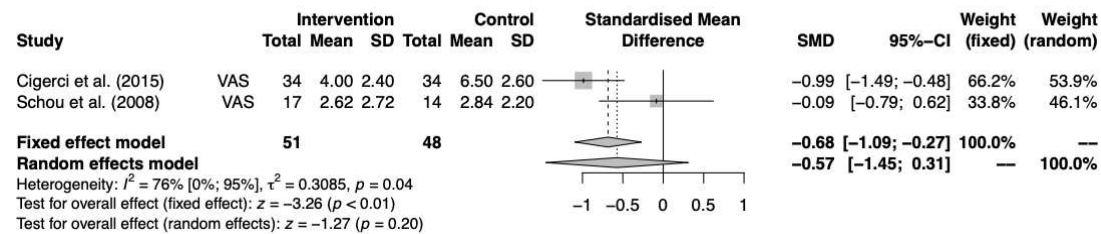

Forest plot of the effect of intraoperative music in combination with postoperative music on postoperative anxiety.

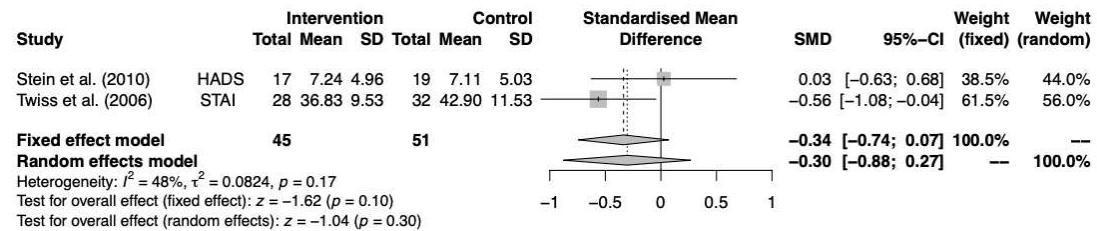

Forest plot of the effect of postoperative music on anxiety.

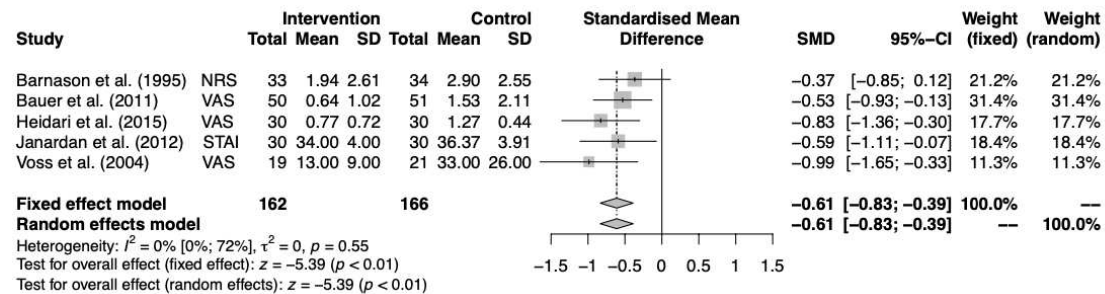

Forest plot of the effect of postoperative music on pain.

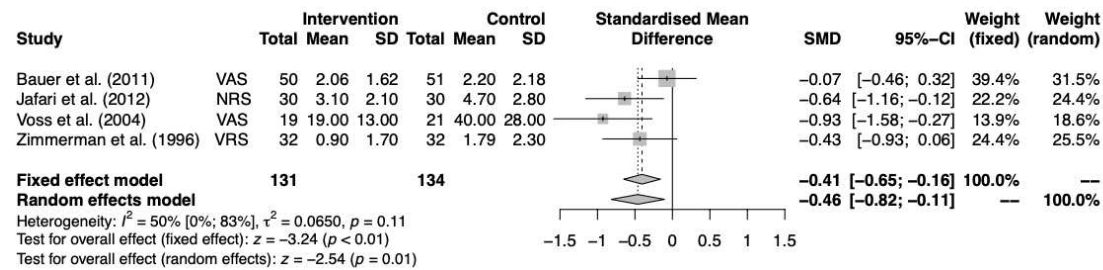

Forest plot of the effect of music on anxiety when patients choose from music lists.

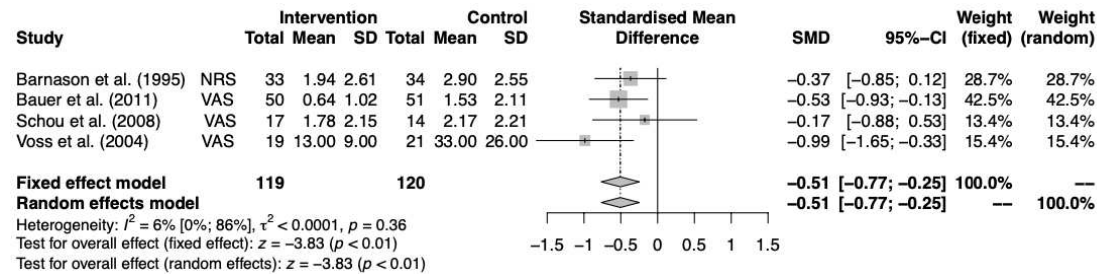

Forest plot of the effect of music on pain when patients choose from music lists.

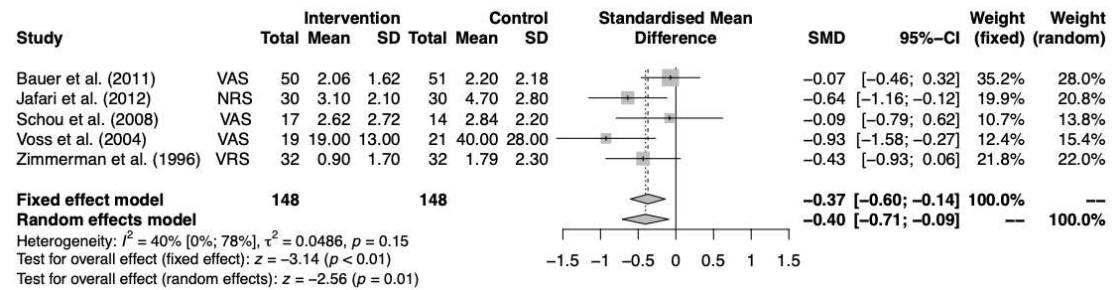

Forest plot of the effect of patient selected music on anxiety.

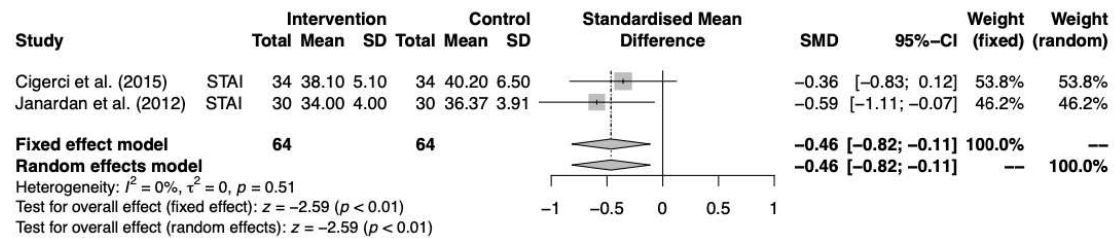

Forest plot of the effect of researcher selected music on anxiety.

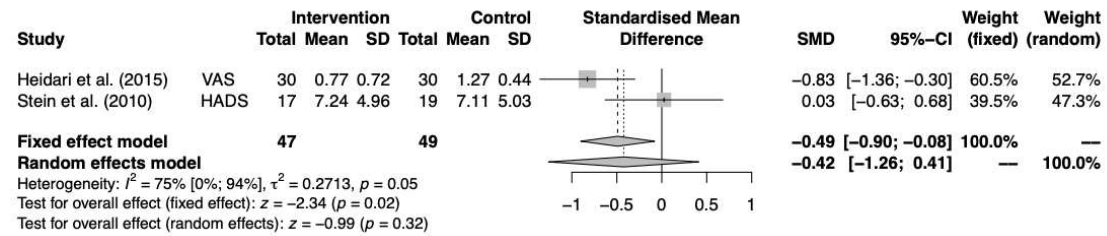

Forest plot of the effect of music on anxiety in studies with low risk of bias due to the randomization procedure.

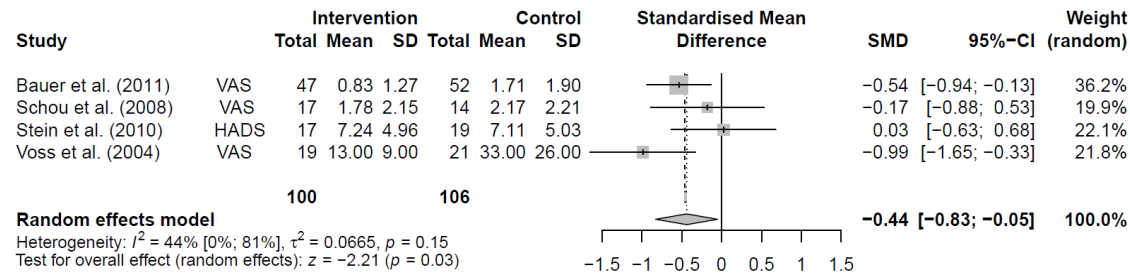

Forest plot of the effect of music on anxiety in studies with high risk of bias due to the randomization procedure.

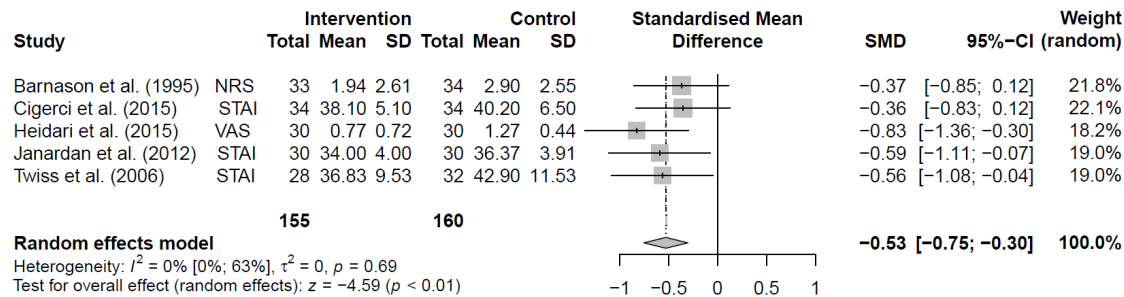

Forest plot of the effect of music on pain in studies with low risk of bias due to the randomization procedure.

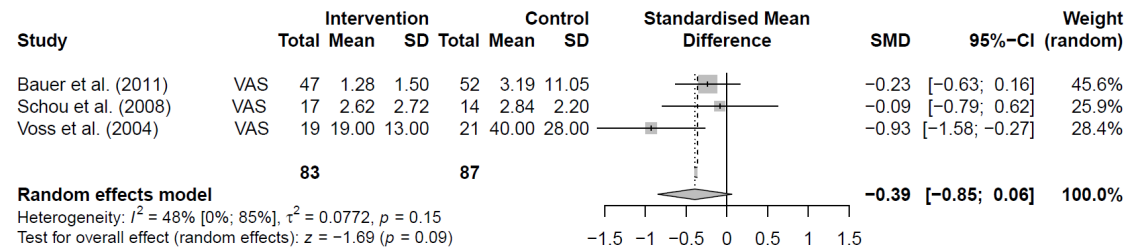

Forest plot of the effect of music on pain in studies with high risk of bias due to the randomization procedure.

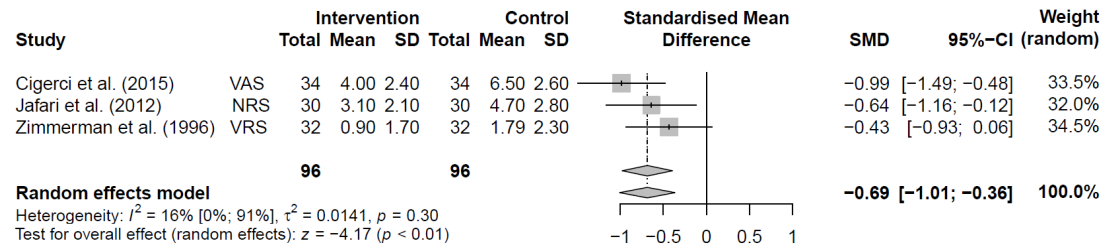

## S7 Effect of music on other parameters

Forest plot of the effect of music on perioperative opioid use.

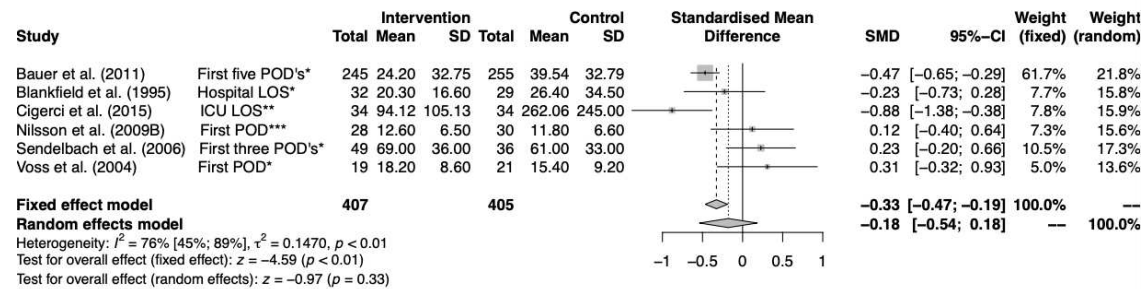

\*Morphine equivalents; \*\*Opioids; \*\*\*Ketobemidone

Forest plot of the effect of music on SpO<sub>2</sub>.

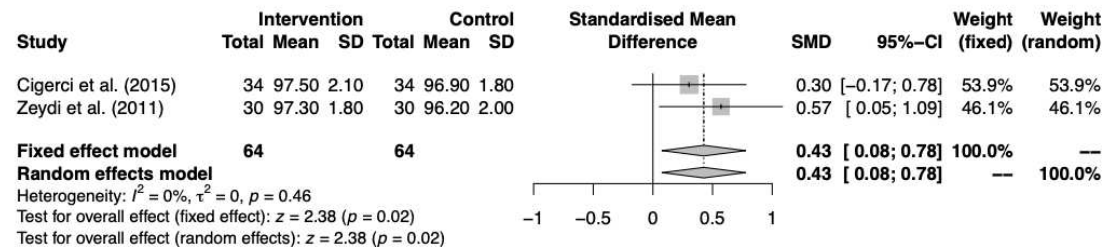



Forest plot of the effect of music on SBP.

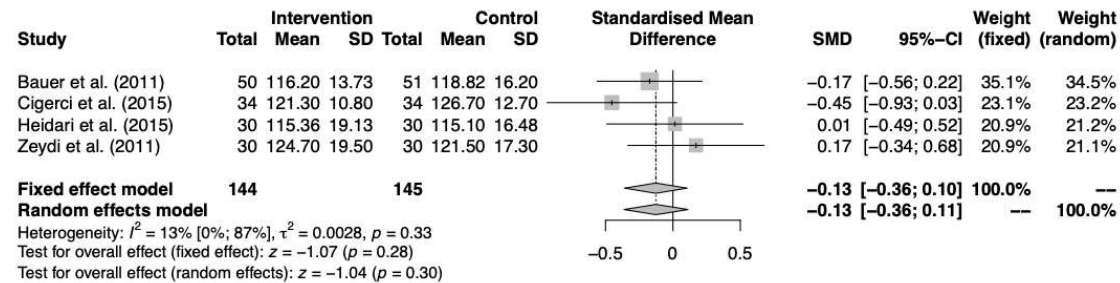

Forest plot of the effect of music on

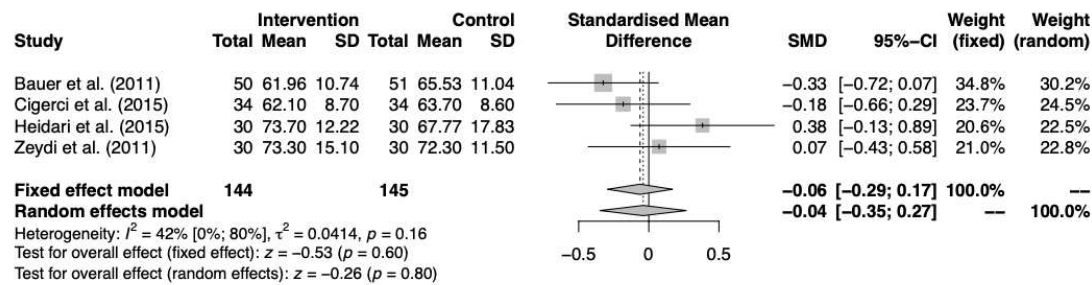

DBP.

Forest plot of the effect of music on HR.

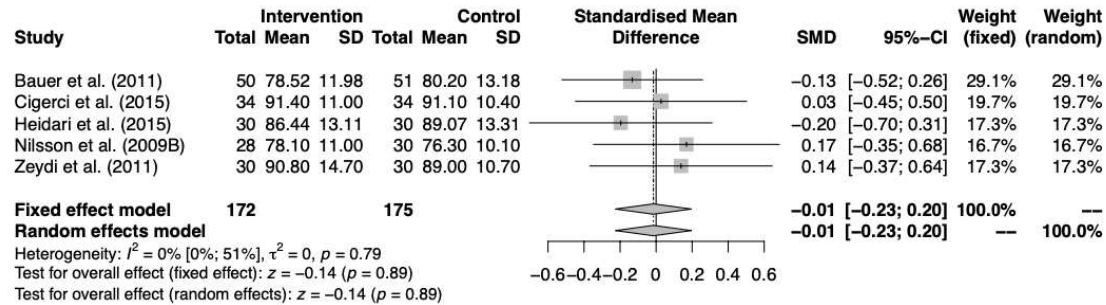

Forest plot of the effect of music on RR.

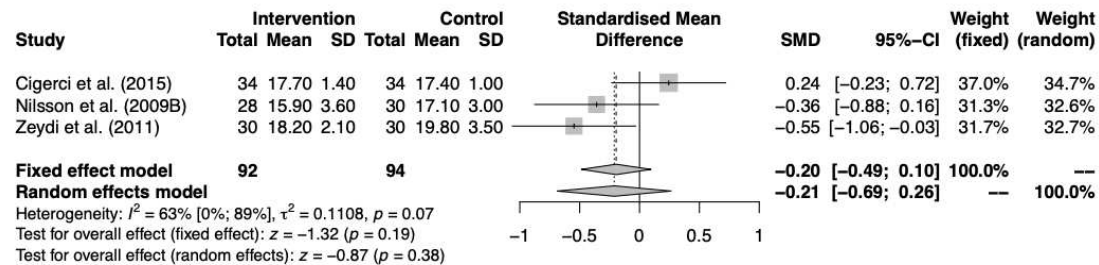

Forest plot of the effect of music on MAP.

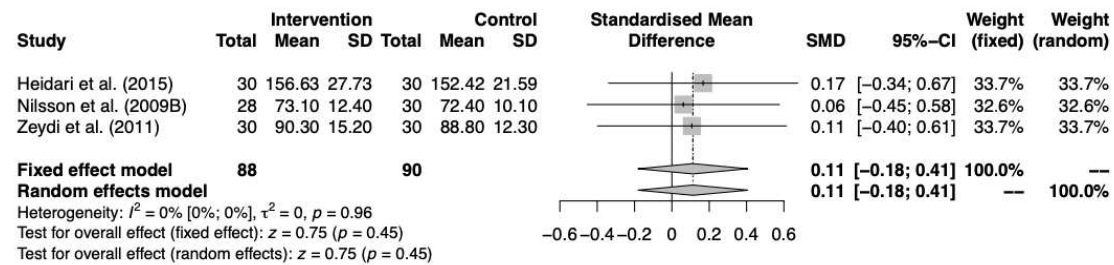

Forest plot of the effect of music on LOS.

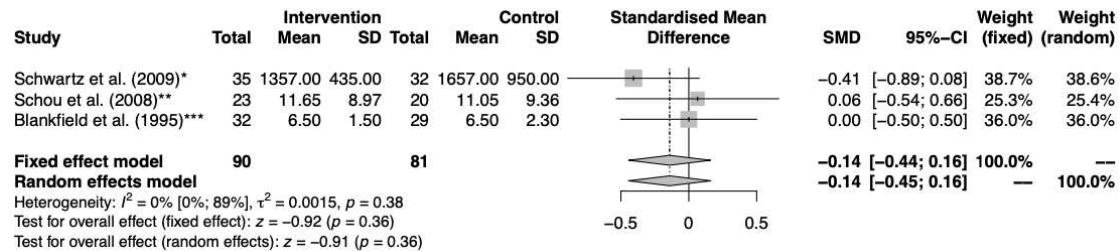

Forest plot of the effect of music on time on mechanical ventilation.

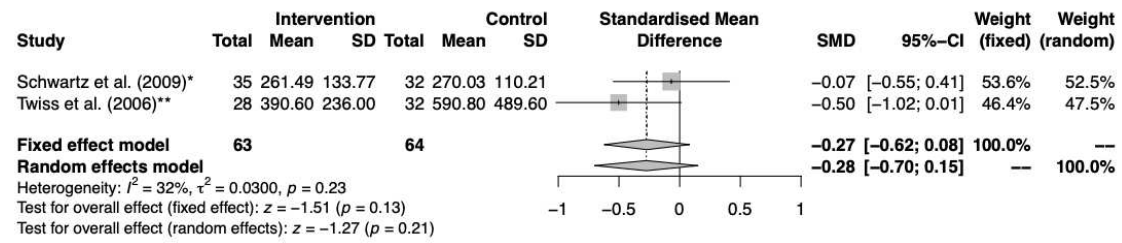

Supplement: openhrt-2020-001474supp001.pdf [file openhrt-2020-001474supp001.pdf]
